# Supplementary material for: Carbon-coated LiFePO4synthesized by a simple solvothermal method
Source: Royal Society of Chemistry journal article supplement (doi:10.1039/c6ce01681b), 2016-01-01
Supplement: c6ce01681b1.pdf [file c6ce01681b1.pdf]

### Supporting Information

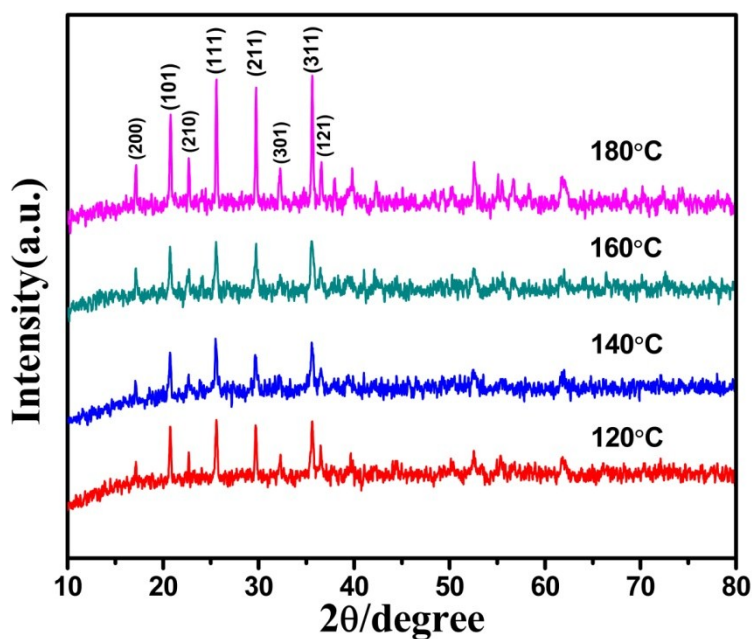

Figure S1. XRD patterns of the LFP/C-5 samples prepared under different reaction temperature.

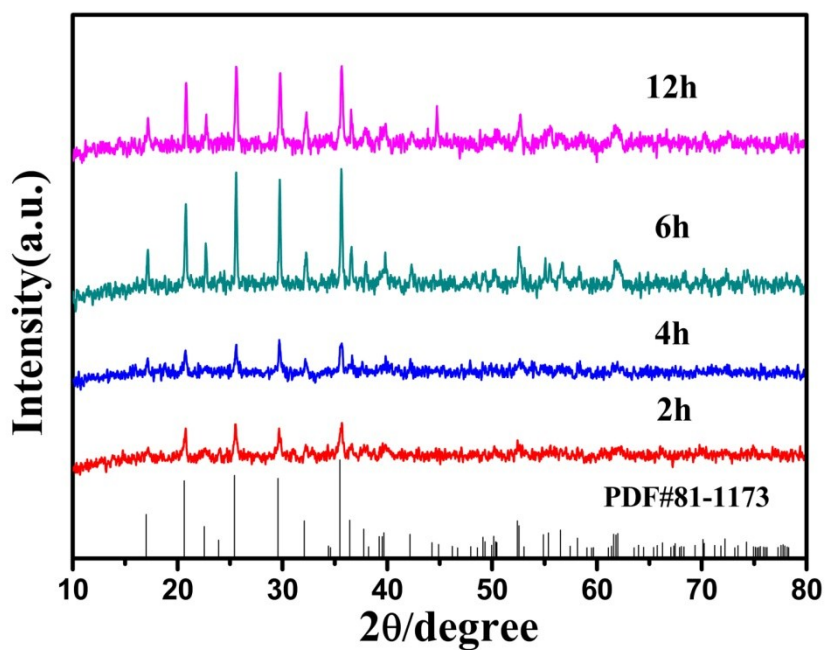

Figure S2. XRD patterns of the LFP/C-5 samples prepared with different reaction time.

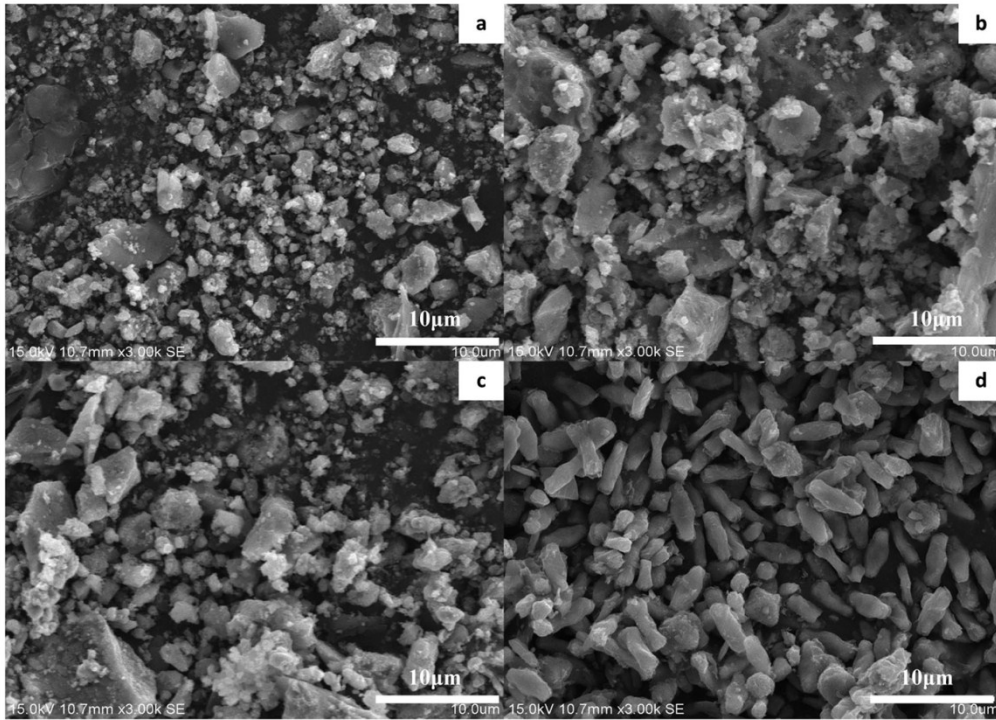

Figure S3. SEM images of LFP/C-5 samples prepared by various reaction temperature:  
(a) 120°C, (b) 140°C, (c) 160°C and (d) 180°C, respectively.

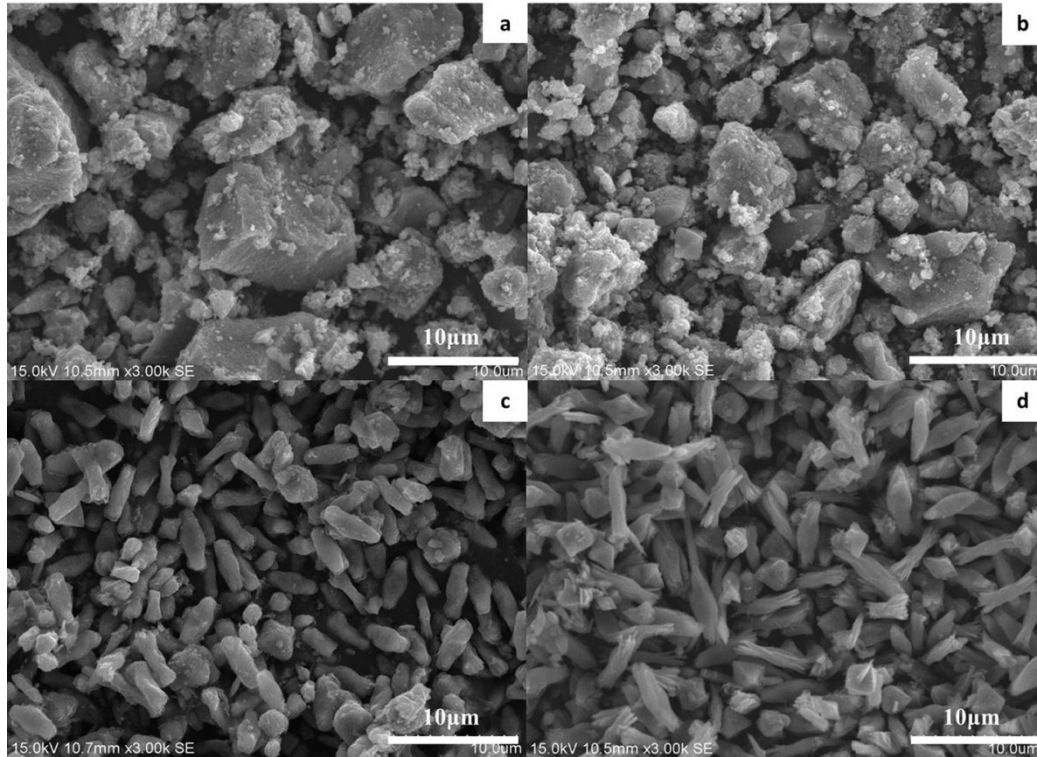

Figure S4. SEM images of LFP/C-5 samples prepared by various reaction time: (a) 2h,  
(b) 4h, (c) 6h and (d) 12h, respectively.

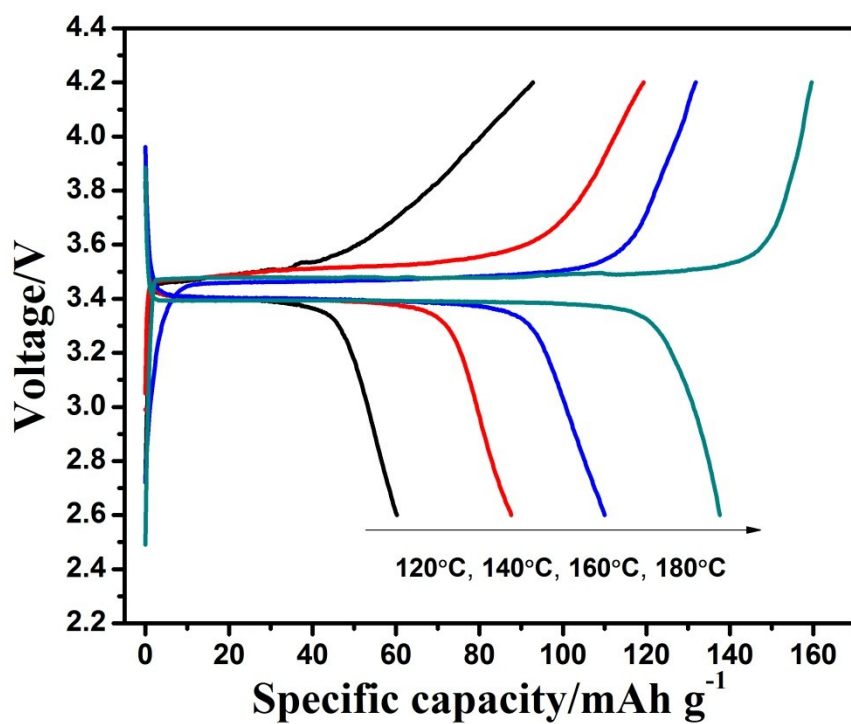

Figure S5. First charge/discharge curves of prepared by different reaction temperature.

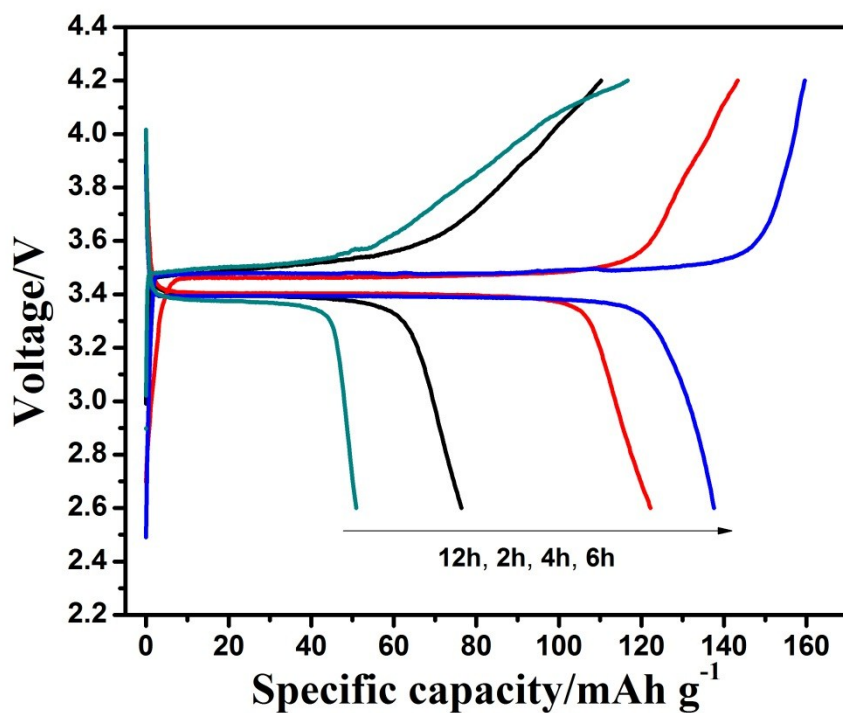

Figure S6. First charge/discharge curves of prepared by different reaction time.
